# Supplementary material for: Low-Dose Interleukin-2 Ameliorates Colitis in a Preclinical Humanized Mouse Model
Source: PubMed Central journal article supplement — Cell Mol Gastroenterol Hepatol. 2019 May 9;8(2):193–5. doi: 10.1016/j.jcmgh.2019.05.001 (PMC6661391; doi:10.1016/j.jcmgh.2019.05.001), 2019-05-09
Supplement: mmc1.pdf [file mmc1.pdf]

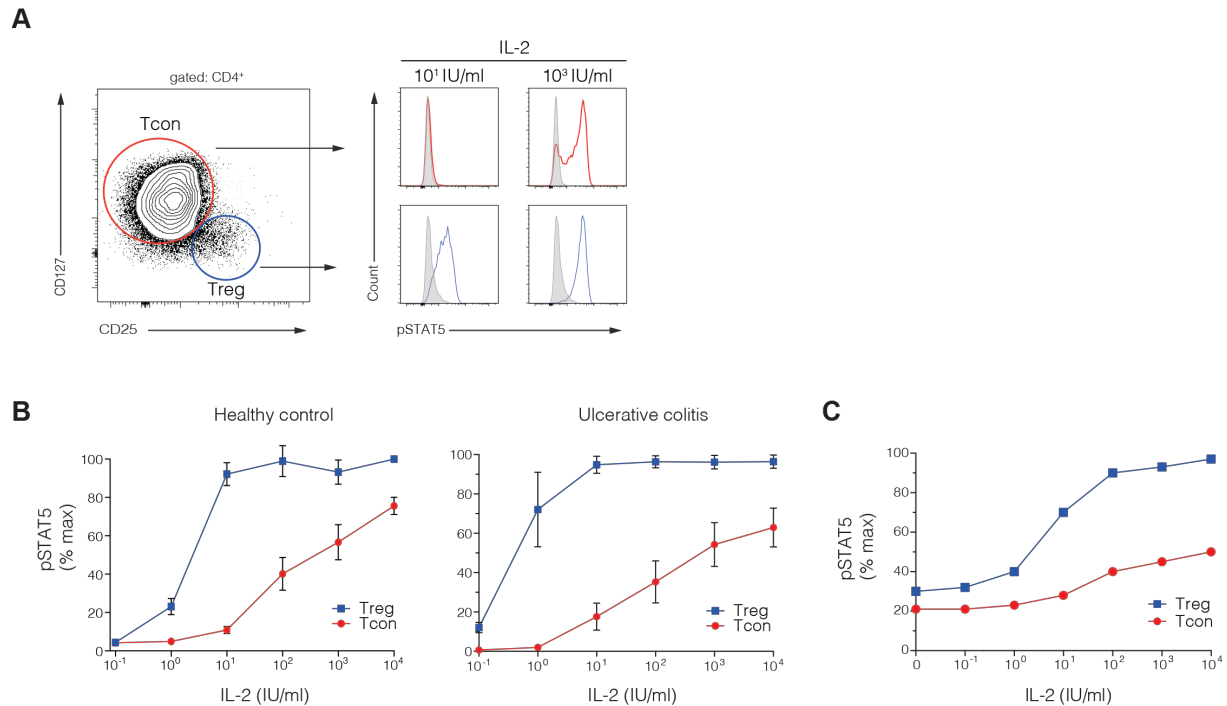

**Supplementary Figure 1. Low-dose IL-2 selectively activates human Tregs in healthy donors and UC patients.** (A) Representative flow cytometry plots of human PBMC treated with  $10^1$  IUml<sup>-1</sup> or  $10^3$  IUml<sup>-1</sup> IL-2 for 20 min. Treg cells were gated based on CD127<sup>lo</sup>CD25<sup>+</sup> staining (red), whereas conventional T cells (Tcon) were gated based on CD127<sup>+</sup>CD25<sup>-</sup> staining (blue; left). Phosphorylation of STAT5 (pSTAT5, Tyr-694) in Tcon (red) and Treg (blue) is shown in histograms upon stimulation with indicated IL-2 concentrations (right). (B) Graphical representation of pSTAT5 in Tcon (red) and Treg (blue) from PBMCs following IL-2 dose escalation ranging from  $10^{-1}$  IUml<sup>-1</sup> to  $10^4$  IUml<sup>-1</sup> for 20 min in healthy control subjects or patients with UC. Error bars represent the SEM of experimental replicates across 2 donors. (C) Dose-response curve showing pSTAT5 expression in lamina propria Tregs (blue) and Tcons (red) from a patient with UC. Statistical analysis were performed using an unpaired t-test. Error bars are represent the SEM.

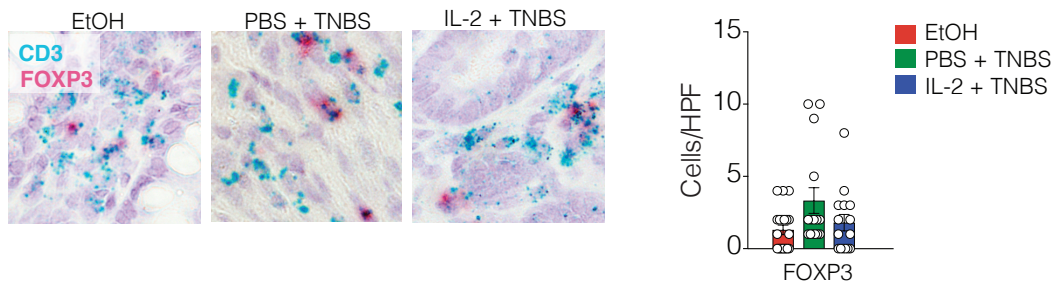

**Supplementary Figure 2. Human Tregs were not expanded in colons of humanized mice treated with LD IL-2.** RNAscope on formalin-fixed paraffin-embedded colonic sections from humanized NSGIIDQ8 mice treated with PBS or LD IL-2 3 days post enema with TNBS or EtOH as a vehicle control. 5 areas per slide were quantified. Images are 40X. Statistical analysis was performed using one-way ANOVA with Tukey's multiple comparisons test. Error bars represent the SEM.

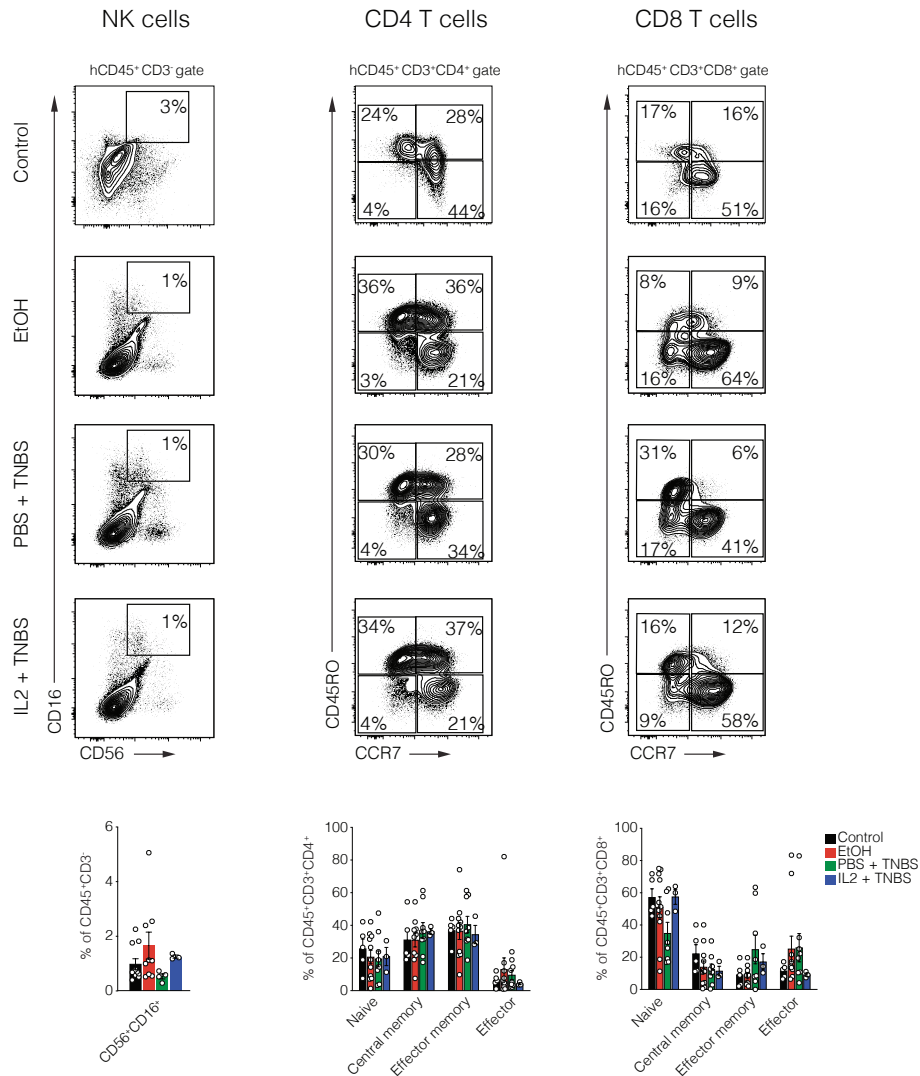

**Supplementary Figure 3. Low dose IL-2 treatment does not alter NK cell and T cell subsets in humanized mice.** FACS analysis of reconstituted NSG.IIDQ8 mice that were untreated (control,  $n \geq 3$ ) or administered a single rectal edema of 50% EtOH ( $n \geq 3$ ) or TNBS followed by PBS ( $n \geq 3$ ) or LD IL-2 treatment ( $n \geq 3$ ). Prior gating is shown on top of each column. Concatenated flow cytometry plots and graphical representation of activated (CD56<sup>+</sup>CD16<sup>+</sup>) NK cells as well as naïve (CCR7<sup>+</sup>CD45RO<sup>-</sup>), central memory (CCR7<sup>+</sup>CD45RO<sup>+</sup>), effector memory (CCR7<sup>+</sup>CD45RO<sup>-</sup>), and effector (CCR7<sup>+</sup>CD45RO<sup>+</sup>) CD4<sup>+</sup> and CD8<sup>+</sup> T cells. Error bars represent the SEM. Statistical analysis performed using one-way ANOVA with Tukey's multiple comparisons test. Error bars are represent the SEM.

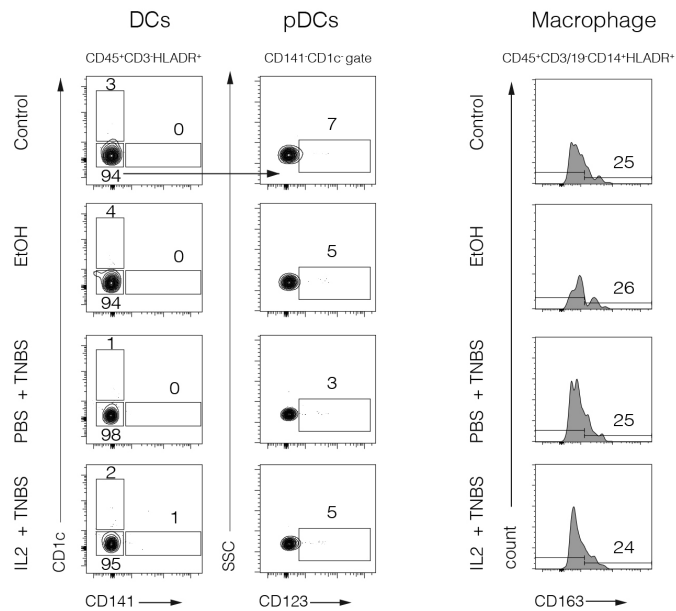

**Supplementary Figure 4. Treatment with LD IL-2 was not associated with altered frequencies of dendritic cells or macrophages.** FACS analysis of concatenated colonic lamina propria cells from reconstituted NSGIIIDQ8 mice that were untreated (control,  $n \geq 3$ ) or administered a single rectal edema of 50% EtOH ( $n \geq 3$ ) or TNBS followed by PBS ( $n \geq 3$ ) or LD IL-2 treatment ( $n \geq 3$ ). Gating strategy is shown on top.
